# Supplementary material for: Diagnostic cutoff values of synovial fluid biomarkers for acute postoperative prosthetic joint infection: a systematic review and meta-analysis
Source: Copernicus journal article supplement (doi:10.5194/jbji-9-17-2024), 2024-01-29
Supplement: Supplementary file [file jbji-9-17-2024-supplement.pdf]

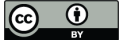

*Supplement of*

## **Diagnostic cutoff values of synovial fluid biomarkers for acute postoperative prosthetic joint infection: a systematic review and meta-analysis**

**Marta Sabater-Martos et al.**

*Correspondence to:* Marta Sabater-Martos ([msabater@clinic.cat](mailto:msabater@clinic.cat))

The copyright of individual parts of the supplement might differ from the article licence.

**Table S1:** Search strategy for MedLine and Embase

|                                                                                                                                                                                                                                                                                                                                                                                                                                                                                                                                                               |
|---------------------------------------------------------------------------------------------------------------------------------------------------------------------------------------------------------------------------------------------------------------------------------------------------------------------------------------------------------------------------------------------------------------------------------------------------------------------------------------------------------------------------------------------------------------|
| Search strategy for MedLine/PubMed—29/12/2021                                                                                                                                                                                                                                                                                                                                                                                                                                                                                                                 |
| ((("Arthroplasty, Replacement, Knee"[Mesh]) OR (prosthetic joint*[tiab]) OR (periprosthetic joint*[tiab]) OR (joint arthroplast*[tiab]) OR (joint arthroplast*[tiab]) OR (joint replace*[tiab]) OR (TKA*[tiab]) OR (arthroplast* [ti]) OR (arthoplast*[ti]) OR (periprosthetic[ti]) OR (knee*[ti])) AND (("Prosthesis-Related Infections"[Mesh]) OR (acute infection*[ti]) OR (PJI* [tiab]))) AND ((sensitivity[tiab]) OR (specificity[tiab]) OR (synovial count* [tiab]) OR (leucocyt* [tiab]) OR (PMN [tiab]) OR (neutrophil [tiab]) OR (synovial [tiab]))) |

|                                                                                                                                                                                                                                                                                                                                                                                                                                                                                                                                  |
|----------------------------------------------------------------------------------------------------------------------------------------------------------------------------------------------------------------------------------------------------------------------------------------------------------------------------------------------------------------------------------------------------------------------------------------------------------------------------------------------------------------------------------|
| Search strategy for Embase—29/12/2021                                                                                                                                                                                                                                                                                                                                                                                                                                                                                            |
| ('replacement arthroplasty'/exp OR ((prosthetic NEAR/2 joint*):ab,ti) OR ((periprosthetic NEAR/2 joint*):ab,ti) OR ((arth*oplast* NEAR/2 joint*):ab,ti) OR tka*:ab,ti OR tja*:ab,ti OR arth*oplast*:ti OR periprosthetic:ti OR joint:ti OR joints:ti) AND ('prosthesis infection'/exp OR ((acute* NEAR/2 infection*):ti) OR pji*:ti) AND (specificity:ab,ti OR sensitivity:ab,ti OR ((synovial NEAR/2 count):ab,ti) OR ((synovial NEAR/2 fluid):ab,ti) OR synovial:ab,ti OR leucocyte*:ab,ti OR pmn*:ab,ti OR neutrophil*:ab,ti) |

**Table S2:** Characteristics of the excluded SR after full text reading

|   | Author and publication year       | Title                                                                                                                                                                                                                     | Reason for exclusion       |
|---|-----------------------------------|---------------------------------------------------------------------------------------------------------------------------------------------------------------------------------------------------------------------------|----------------------------|
| 1 | Pagliaccetti J. et al. 2021       | Variability and Interpretation of Synovial Cell Count and Differential: A Perspective in Hip and Knee Arthroplasty                                                                                                        | Wrong study design         |
| 2 | Fernández-Sampedro, M et al. 2017 | Accuracy of different diagnostic tests for early, delayed and late prosthetic joint infection                                                                                                                             | Wrong Outcome              |
| 3 | Zhang, Chao-Fan et al. 2020       | Debridement, Antibiotics, and Implant Retention for Acute Periprosthetic Joint Infection                                                                                                                                  | Wrong Outcome              |
| 4 | Yu, Bao-Zhan et al. 2020          | Neutrophil to lymphocyte ratio as a predictor for diagnosis of early Periprosthetic joint infection                                                                                                                       | Wrong Outcome              |
| 5 | Li, Hao et al. 2021               | The concordance between preoperative aspiration and intraoperative synovial fluid culture results: intraoperative synovial fluid re-cultures are necessary whether the preoperative aspiration culture is positive or not | Wrong Outcome              |
| 6 | Xu C. et al. 2019                 | Reevaluating Current Cutoffs for Acute Periprosthetic Joint Infection: Current Thresholds Are Insensitive                                                                                                                 | Only reporting sensitivity |
| 7 | Mason, J Bohannon et al. 2003     | The value of white blood cell counts before revision total knee arthroplasty                                                                                                                                              | Wrong population           |

|    |                                                                |                                                                                                                                                                            |                              |
|----|----------------------------------------------------------------|----------------------------------------------------------------------------------------------------------------------------------------------------------------------------|------------------------------|
| 8  | den Bekerom, Michel P J et al. 2006                            | The value of pre-operative aspiration in the diagnosis of an infected prosthetic knee: a retrospective study and review of literature                                      | Wrong population             |
| 9  | Baré et al. 2006                                               | Preoperative evaluations in revision total knee arthroplasty                                                                                                               | Wrong population             |
| 10 | Ghanem E. et al. 2008                                          | Cell count and differential of aspirated fluid in the diagnosis of infection at the site of total knee arthroplasty                                                        | Wrong population             |
| 11 | Schinsky, Mark F et al. 2008                                   | Perioperative testing for joint infection in patients undergoing revision total hip arthroplasty                                                                           | Wrong population             |
| 12 | Lee, Su Chan et al. 2010                                       | Analysis of synovial fluid in culture-negative samples of suspicious periprosthetic infections                                                                             | Wrong population             |
| 13 | Society of Unicondylar Research and Continuing Education. 2012 | Diagnosis of periprosthetic joint infection after unicompartmental knee arthroplasty                                                                                       | Wrong population             |
| 14 | Zmistowski, Benjamin et al. 2012                               | Periprosthetic joint infection diagnosis: a complete understanding of white blood cell count and differential                                                              | Wrong population             |
| 15 | Dinneen, A et al. 2013                                         | Synovial fluid white cell and differential count in the diagnosis or exclusion of prosthetic joint infection                                                               | Wrong population             |
| 16 | Christensen, Christian P. et al. 2013                          | The natural progression of synovial fluid white blood-cell counts and the percentage of polymorphonuclear cells after primary total knee arthroplasty: a multicenter study | Wrong population             |
| 17 | Lenski, Markus et al. 2014                                     | Synovial IL-6 as inflammatory marker in periprosthetic joint infections                                                                                                    | Wrong population             |
| 18 | Claassen, Leif et al. 2014                                     | Preoperative diagnostic for periprosthetic joint infection prior to total knee revision arthroplasty                                                                       | Wrong population             |
| 19 | Lenski Markus et al. 2015                                      | Diagnostic potential of inflammatory markers in septic arthritis and periprosthetic joint infections: a clinical study with 719 patients                                   | Wrong population             |
| 20 | Shafafy, R et al. 2015                                         | Use of leucocyte esterase reagent strips in the diagnosis or exclusion of prosthetic joint infection                                                                       | Wrong population             |
| 21 | Sousa, R et al. 2017                                           | Improving the accuracy of synovial fluid analysis in the diagnosis of prosthetic joint infection with simple and inexpensive biomarkers                                    | Wrong population             |
| 22 | Gallo, Jiri et al. 2017                                        | Excellent AUC for joint fluid cytology in the detection/exclusion of hip and knee prosthetic joint infection                                                               | Wrong population             |
| 23 | Shahi, Alisina et al. 2017                                     | Diagnosing Periprosthetic Joint Infection: And the Winner Is?                                                                                                              | Wrong population             |
| 24 | De Vecchi, Elena et al. 2018                                   | Alpha defensin, leukocyte esterase, C-reactive protein, and leukocyte count in synovial fluid for pre-operative diagnosis of periprosthetic infection                      | Wrong population             |
| 25 | Parvizi, Javad et al. 2018                                     | The 2018 Definition of Periprosthetic Hip and Knee Infection: An Evidence-Based and Validated Criteria                                                                     | Wrong population and outcome |
| 26 | Strahm, Carol et al 2018                                       | Accuracy of Synovial Leukocyte and Polymorphonuclear Cell Count in Patients with Shoulder Prosthetic Joint Infection                                                       | Wrong population             |
| 27 | Klim, S M et al. 2018                                          | Fibrinogen - A Practical and Cost Efficient Biomarker for Detecting Periprosthetic Joint Infection                                                                         | Wrong population             |

|    |                                      |                                                                                                                                                                                                                       |                              |
|----|--------------------------------------|-----------------------------------------------------------------------------------------------------------------------------------------------------------------------------------------------------------------------|------------------------------|
| 28 | Zahar, Akos et al. 2018              | How Reliable Is the Cell Count Analysis in the Diagnosis of Prosthetic Joint Infection?                                                                                                                               | Wrong population             |
| 29 | Ding, Benjamin Tk et al. 2019        | Accuracy of the $\alpha$ -defensin lateral flow assay for diagnosing periprosthetic joint infection in Asians                                                                                                         | Wrong population             |
| 30 | Tahta, Mesut et al. 2019             | Does inflammatory joint diseases affect the accuracy of infection biomarkers in patients with periprosthetic joint infections? A prospective comparative reliability study                                            | Wrong population             |
| 31 | Shahi, Alisina et al. 2019           | The Leukocyte Esterase Test for Periprosthetic Joint Infection Is Not Affected by Prior Antibiotic Administration                                                                                                     | Wrong population             |
| 32 | Lazarides, Alexander L et al. 2019   | Traditional Laboratory Markers Hold Low Diagnostic Utility for Immunosuppressed Patients With Periprosthetic Joint Infections                                                                                         | Wrong population             |
| 33 | Yermak, Katsiaryna et al. 2019       | Performance of synovial fluid D-lactate for the diagnosis of periprosthetic joint infection: A prospective observational study                                                                                        | Wrong population             |
| 34 | Qin, Leilei et al. 2020              | Evaluation of synovial fluid neutrophil CD64 index as a screening biomarker of prosthetic joint infection                                                                                                             | Wrong population             |
| 35 | Chu, Lei et al. 2020                 | The combinations of multiple factors to improve the diagnostic sensitivity and specificity after artificial joint infection                                                                                           | Wrong population             |
| 36 | Bäcker, Henrik C et al. 2020         | Increased Synovial Inflammatory Markers in Aseptic Total Hip Arthroplasty Dislocation                                                                                                                                 | Wrong population and outcome |
| 37 | Deirmengian, Carl A et al. 2020      | False-Positive Automated Synovial Fluid White Blood Cell Counting Is a Concern for Both Hip and Knee Arthroplasty Aspirates                                                                                           | Wrong population             |
| 38 | Zhao, Guanglei et al 2020            | Predictive values of the postoperative neutrophil-to-lymphocyte ratio, platelet-to-lymphocyte ratio, and lymphocyte-to-monocyte ratio for the diagnosis of early periprosthetic joint infections: a preliminary study | Wrong population             |
| 39 | Mihalič, René et al. 2020            | Synovial fluid interleukin-6 is not superior to cell count and differential in the detection of periprosthetic joint infection                                                                                        | Wrong population             |
| 40 | Sharma, Katyayini et al. 2020        | Comparative analysis of 23 synovial fluid biomarkers for hip and knee periprosthetic joint infection detection.                                                                                                       | Wrong population             |
| 41 | Tirumala, Venkatsaiakhil et al. 2021 | Diagnostic Utility of Platelet Count/Lymphocyte Count Ratio and Platelet Count/Mean Platelet Volume Ratio in Periprosthetic Joint Infection Following Total Knee Arthroplasty.                                        | Wrong population             |
| 42 | Fink, Bernd et al. 2021              | The Graphical Representation of Cell Count Representation: A New Procedure for the Diagnosis of Periprosthetic Joint Infections.                                                                                      | Wrong population             |
| 43 | Ivy, Morgan I et al. 2021            | Synovial fluid $\alpha$ defensin has comparable accuracy to synovial fluid white blood cell count and polymorphonuclear percentage for periprosthetic joint infection diagnosis                                       | Wrong population             |
| 44 | Salar, Omer et al. 2021              | Diagnosis of knee prosthetic joint infection; aspiration and biopsy                                                                                                                                                   | Wrong population             |

**Table S3: Additional information about QUADAS-2 application**

**Paper 1: Bedair et al. 2011**

**Domain 1 Patient selection:** Describe included patients (prior testing, presentation, intended use of index test and setting)

| Questions                                                                                                                       | Answer (Yes, No or Unclear) | Motive        |
|---------------------------------------------------------------------------------------------------------------------------------|-----------------------------|---------------|
| 1.1 Was a consecutive or random sample of patients enrolled?                                                                    | No                          | Retrospective |
| 1.2 Was a case-control design avoided?                                                                                          | Unclear                     |               |
| 1.3 Did the study avoid inappropriate exclusions?                                                                               | yes                         |               |
| <b>RISK OF BIAS:</b><br>Could the selection of patients have introduced bias? (High, Low or Unclear)                            | <b>HIGH</b>                 |               |
| <b>APPLICABILITY:</b><br>Are there concerns that the included patients do not match the review question? (High, Low or Unclear) | <b>LOW</b>                  |               |

**Domain 2 Index test:** Describe the index test and how it was conducted and interpreted

| Questions                                                                                                                                                | Answer (Yes, No or Unclear) | Motive |
|----------------------------------------------------------------------------------------------------------------------------------------------------------|-----------------------------|--------|
| 2.1 Were the index test results interpreted without knowledge of the results of the reference standard?                                                  | Yes                         |        |
| 2.2 If a threshold was used, was it pre-specified??                                                                                                      | Yes                         |        |
| <b>RISK OF BIAS:</b><br>Could the conduct or interpretation of the index test have introduced bias? (High, Low or Unclear)                               | <b>LOW</b>                  |        |
| <b>APPLICABILITY:</b><br>Are there concerns that the index test, its conduct, or interpretation differ from the review question?? (High, Low or Unclear) | <b>LOW</b>                  |        |

**Domain 3 Reference Standard:** Describe the reference standard and how it was conducted and interpreted:

| Questions                                                                                               | Answer (Yes, No or Unclear) | Motive                   |
|---------------------------------------------------------------------------------------------------------|-----------------------------|--------------------------|
| 3.1 Is the reference standard likely to correctly classify the target condition?                        | No                          | Cultures may be negative |
| 3.2 Were the reference standard results interpreted without knowledge of the results of the index test? | Yes                         |                          |
| <b>RISK OF BIAS:</b>                                                                                    | <b>HIGH</b>                 |                          |

|                                                                                                                                                                       |     |  |
|-----------------------------------------------------------------------------------------------------------------------------------------------------------------------|-----|--|
| Could the reference standard, its conduct, or its interpretation have introduced bias? (High, Low or Unclear)                                                         |     |  |
| <b>APPLICABILITY:</b><br>Are there concerns that the target condition as defined by the reference standard does not match the review question? (High, Low or Unclear) | LOW |  |

**Domain 4 Flow and Timing:** Describe any patients who did not receive the index test(s) and/or reference standard or who were excluded from the 2x2 table (refer to flow diagram): Describe the time interval and any interventions between index test(s) and reference standard:

| Questions                                                                                   | Answer (Yes, No or Unclear) | Motive                                                   |
|---------------------------------------------------------------------------------------------|-----------------------------|----------------------------------------------------------|
| 4.1 Was there an appropriate interval between index test(s) and reference standard?         | Unclear                     | Not mention when day did the aspiration and the cultures |
| 4.2 Did all patients receive a reference standard??                                         | yes                         |                                                          |
| 4.3 Did all patients receive the same reference standard??                                  | yes                         |                                                          |
| 4.4 Were all patients included in the analysis?                                             | Yes                         |                                                          |
| <b>RISK OF BIAS:</b><br>Could the patient flow have introduced bias? (High, Low or Unclear) | LOW                         |                                                          |

**Paper 2: Yi et al. 2014**

**Domain 1 Patient selection:** Describe included patients (prior testing, presentation, intended use of index test and setting)

| Questions                                                                                                                       | Answer (Yes, No or Unclear) | Motive                                        |
|---------------------------------------------------------------------------------------------------------------------------------|-----------------------------|-----------------------------------------------|
| 1.1 Was a consecutive or random sample of patients enrolled?                                                                    | No                          | Retrospective                                 |
| 1.2 Was a case-control design avoided?                                                                                          | Unclear                     |                                               |
| 1.3 Did the study avoid inappropriate exclusions?                                                                               | No                          | They only include patients undergoing surgery |
| <b>RISK OF BIAS:</b><br>Could the selection of patients have introduced bias? (High, Low or Unclear)                            | HIGH                        |                                               |
| <b>APPLICABILITY:</b><br>Are there concerns that the included patients do not match the review question? (High, Low or Unclear) | UNCLEAR                     |                                               |

**Domain 2 Index test:** Describe the index test and how it was conducted and interpreted

| Questions                                                                                                                                                | Answer (Yes, No or Unclear) | Motive   |
|----------------------------------------------------------------------------------------------------------------------------------------------------------|-----------------------------|----------|
| 2.1 Were the index test results interpreted without knowledge of the results of the reference standard?                                                  | Yes                         |          |
| 2.2 If a threshold was used, was it pre-specified??                                                                                                      | -                           | Non used |
| <b>RISK OF BIAS:</b><br>Could the conduct or interpretation of the index test have introduced bias? (High, Low or Unclear)                               | LOW                         |          |
| <b>APPLICABILITY:</b><br>Are there concerns that the index test, its conduct, or interpretation differ from the review question?? (High, Low or Unclear) | LOW                         |          |

**Domain 3 Reference Standard:** Describe the reference standard and how it was conducted and interpreted:

| Questions                                                                                               | Answer (Yes, No or Unclear) | Motive                   |
|---------------------------------------------------------------------------------------------------------|-----------------------------|--------------------------|
| 3.1 Is the reference standard likely to correctly classify the target condition?                        | No                          | Cultures may be negative |
| 3.2 Were the reference standard results interpreted without knowledge of the results of the index test? | Unclear                     | retrospective            |
| <b>RISK OF BIAS:</b><br>Could the reference standard, its conduct, or its interpretation                | HIGH                        |                          |

|                                                                                                                                                                       |     |  |
|-----------------------------------------------------------------------------------------------------------------------------------------------------------------------|-----|--|
| have introduced bias? (High, Low or Unclear)                                                                                                                          |     |  |
| <b>APPLICABILITY:</b><br>Are there concerns that the target condition as defined by the reference standard does not match the review question? (High, Low or Unclear) | LOW |  |

**Domain 4 Flow and Timing:** Describe any patients who did not receive the index test(s) and/or reference standard or who were excluded from the 2x2 table (refer to flow diagram): Describe the time interval and any interventions between index test(s) and reference standard:

| Questions                                                                                   | Answer (Yes, No or Unclear) | Motive |
|---------------------------------------------------------------------------------------------|-----------------------------|--------|
| 4.1 Was there an appropriate interval between index test(s) and reference standard?         | Unclear                     |        |
| 4.2 Did all patients receive a reference standard??                                         | Yes                         |        |
| 4.3 Did all patients receive the same reference standard??                                  | Yes                         |        |
| 4.4 Were all patients included in the analysis?                                             | Yes                         |        |
| <b>RISK OF BIAS:</b><br>Could the patient flow have introduced bias? (High, Low or Unclear) | LOW                         |        |



**Paper 3: Kim et al. 2017**

Domain 1 Patient selection: Describe included patients (prior testing, presentation, intended use of index test and setting)

| Questions                                                                                                                       | Answer (Yes, No or Unclear) | Motive                                  |
|---------------------------------------------------------------------------------------------------------------------------------|-----------------------------|-----------------------------------------|
| 1.1 Was a consecutive or random sample of patients enrolled?                                                                    | No                          | retrospective                           |
| 1.2 Was a case-control design avoided?                                                                                          | Unclear                     |                                         |
| 1.3 Did the study avoid inappropriate exclusions?                                                                               | Yes                         | They exclude patients but are justified |
| <b>RISK OF BIAS:</b><br>Could the selection of patients have introduced bias? (High, Low or Unclear)                            | HIGH                        |                                         |
| <b>APPLICABILITY:</b><br>Are there concerns that the included patients do not match the review question? (High, Low or Unclear) | LOW                         |                                         |

Domain 2 Index test: Describe the index test and how it was conducted and interpreted

| Questions                                                                                                                                                | Answer (Yes, No or Unclear) | Motive |
|----------------------------------------------------------------------------------------------------------------------------------------------------------|-----------------------------|--------|
| 2.1 Were the index test results interpreted without knowledge of the results of the reference standard?                                                  | Yes                         |        |
| 2.2 If a threshold was used, was it pre-specified??                                                                                                      | Yes                         |        |
| <b>RISK OF BIAS:</b><br>Could the conduct or interpretation of the index test have introduced bias? (High, Low or Unclear)                               | LOW                         |        |
| <b>APPLICABILITY:</b><br>Are there concerns that the index test, its conduct, or interpretation differ from the review question?? (High, Low or Unclear) | LOW                         |        |

Domain 3 Reference Standard: Describe the reference standard and how it was conducted and interpreted:

| Questions                                                                                               | Answer (Yes, No or Unclear) | Motive            |
|---------------------------------------------------------------------------------------------------------|-----------------------------|-------------------|
| 3.1 Is the reference standard likely to correctly classify the target condition?                        | No                          | Negative cultures |
| 3.2 Were the reference standard results interpreted without knowledge of the results of the index test? | Yes                         |                   |
| <b>RISK OF BIAS:</b><br>Could the reference standard, its conduct, or its interpretation                | HIGH                        |                   |

|                                                                                                                                                                       |     |  |
|-----------------------------------------------------------------------------------------------------------------------------------------------------------------------|-----|--|
| have introduced bias? (High, Low or Unclear)                                                                                                                          |     |  |
| <b>APPLICABILITY:</b><br>Are there concerns that the target condition as defined by the reference standard does not match the review question? (High, Low or Unclear) | LOW |  |

**Domain 4 Flow and Timing:** Describe any patients who did not receive the index test(s) and/or reference standard or who were excluded from the 2x2 table (refer to flow diagram): Describe the time interval and any interventions between index test(s) and reference standard:

| Questions                                                                                   | Answer (Yes, No or Unclear) | Motive                   |
|---------------------------------------------------------------------------------------------|-----------------------------|--------------------------|
| 4.1 Was there an appropriate interval between index test(s) and reference standard?         | Unclear                     |                          |
| 4.2 Did all patients receive a reference standard??                                         | Yes                         |                          |
| 4.3 Did all patients receive the same reference standard??                                  | Yes                         |                          |
| 4.4 Were all patients included in the analysis?                                             | No                          | Exclusions are justified |
| <b>RISK OF BIAS:</b><br>Could the patient flow have introduced bias? (High, Low or Unclear) | Unclear                     |                          |

**Paper 4: Xu et al. 2019**

**Domain 1 Patient selection:** Describe included patients (prior testing, presentation, intended use of index test and setting)

| Questions                                                                                                                       | Answer (Yes, No or Unclear) | Motive                          |
|---------------------------------------------------------------------------------------------------------------------------------|-----------------------------|---------------------------------|
| 1.1 Was a consecutive or random sample of patients enrolled?                                                                    | No                          | Not mentioned but retrospective |
| 1.2 Was a case-control design avoided?                                                                                          | yes                         |                                 |
| 1.3 Did the study avoid inappropriate exclusions?                                                                               | No                          |                                 |
| <b>RISK OF BIAS:</b><br>Could the selection of patients have introduced bias? (High, Low or Unclear)                            | <b>HIGH</b>                 |                                 |
| <b>APPLICABILITY:</b><br>Are there concerns that the included patients do not match the review question? (High, Low or Unclear) | <b>UNCLEAR</b>              |                                 |

**Domain 2 Index test:** Describe the index test and how it was conducted and interpreted

| Questions                                                                                                                                               | Answer (Yes, No or Unclear) | Motive |
|---------------------------------------------------------------------------------------------------------------------------------------------------------|-----------------------------|--------|
| 2.1 Were the index test results interpreted without knowledge of the results of the reference standard?                                                 | Yes                         |        |
| 2.2 If a threshold was used, was it pre-specified??                                                                                                     | Unclear                     |        |
| <b>RISK OF BIAS:</b><br>Could the conduct or interpretation of the index test have introduced bias? (High, Low or Unclear)                              | <b>UNCLEAR</b>              |        |
| <b>APPLICABILITY:</b><br>Are there concerns that the index test, its conduct, or interpretation differ from the review question? (High, Low or Unclear) | <b>LOW</b>                  |        |

**Domain 3 Reference Standard:** Describe the reference standard and how it was conducted and interpreted:

| Questions                                                                                               | Answer (Yes, No or Unclear) | Motive |
|---------------------------------------------------------------------------------------------------------|-----------------------------|--------|
| 3.1 Is the reference standard likely to correctly classify the target condition?                        | No                          |        |
| 3.2 Were the reference standard results interpreted without knowledge of the results of the index test? | Yes                         |        |
| <b>RISK OF BIAS:</b><br>Could the reference standard, its conduct, or its interpretation                | <b>UNCLEAR</b>              |        |

|                                                                                                                                                                       |            |  |
|-----------------------------------------------------------------------------------------------------------------------------------------------------------------------|------------|--|
| have introduced bias? (High, Low or Unclear)                                                                                                                          |            |  |
| <b>APPLICABILITY:</b><br>Are there concerns that the target condition as defined by the reference standard does not match the review question? (High, Low or Unclear) | <b>LOW</b> |  |

**Domain 4 Flow and Timing:** Describe any patients who did not receive the index test(s) and/or reference standard or who were excluded from the 2x2 table (refer to flow diagram): Describe the time interval and any interventions between index test(s) and reference standard:

| Questions                                                                                   | Answer (Yes, No or Unclear) | Motive        |
|---------------------------------------------------------------------------------------------|-----------------------------|---------------|
| 4.1 Was there an appropriate interval between index test(s) and reference standard?         | Unclear                     | Not mentioned |
| 4.2 Did all patients receive a reference standard??                                         | Unclear                     |               |
| 4.3 Did all patients receive the same reference standard??                                  | Unclear                     |               |
| 4.4 Were all patients included in the analysis?                                             | No                          |               |
| <b>RISK OF BIAS:</b><br>Could the patient flow have introduced bias? (High, Low or Unclear) | <b>HIGH</b>                 |               |

**Paper 5: Sukhonthamarn et al. 2020**

**Domain 1 Patient selection:** Describe included patients (prior testing, presentation, intended use of index test and setting)

| Questions                                                                                                                       | Answer (Yes, No or Unclear) | Motive        |
|---------------------------------------------------------------------------------------------------------------------------------|-----------------------------|---------------|
| 1.1 Was a consecutive or random sample of patients enrolled?                                                                    | No                          | Retrospective |
| 1.2 Was a case-control design avoided?                                                                                          | Unclear                     |               |
| 1.3 Did the study avoid inappropriate exclusions?                                                                               | Yes                         |               |
| <b>RISK OF BIAS:</b><br>Could the selection of patients have introduced bias? (High, Low or Unclear)                            | HIGH                        |               |
| <b>APPLICABILITY:</b><br>Are there concerns that the included patients do not match the review question? (High, Low or Unclear) | LOW                         |               |

**Domain 2 Index test:** Describe the index test and how it was conducted and interpreted

| Questions                                                                                                                                                | Answer (Yes, No or Unclear) | Motive        |
|----------------------------------------------------------------------------------------------------------------------------------------------------------|-----------------------------|---------------|
| 2.1 Were the index test results interpreted without knowledge of the results of the reference standard?                                                  | Yes                         |               |
| 2.2 If a threshold was used, was it pre-specified??                                                                                                      | Unclear                     | Not mentioned |
| <b>RISK OF BIAS:</b><br>Could the conduct or interpretation of the index test have introduced bias? (High, Low or Unclear)                               | LOW                         |               |
| <b>APPLICABILITY:</b><br>Are there concerns that the index test, its conduct, or interpretation differ from the review question?? (High, Low or Unclear) | LOW                         |               |

**Domain 3 Reference Standard:** Describe the reference standard and how it was conducted and interpreted:

| Questions                                                                                               | Answer (Yes, No or Unclear) | Motive                   |
|---------------------------------------------------------------------------------------------------------|-----------------------------|--------------------------|
| 3.1 Is the reference standard likely to correctly classify the target condition?                        | No                          | Cultures may be negative |
| 3.2 Were the reference standard results interpreted without knowledge of the results of the index test? | Yes                         |                          |
| <b>RISK OF BIAS:</b><br>Could the reference standard, its conduct, or its interpretation                | HIGH                        |                          |

|                                                                                                                                                                       |     |  |
|-----------------------------------------------------------------------------------------------------------------------------------------------------------------------|-----|--|
| have introduced bias? (High, Low or Unclear)                                                                                                                          |     |  |
| <b>APPLICABILITY:</b><br>Are there concerns that the target condition as defined by the reference standard does not match the review question? (High, Low or Unclear) | LOW |  |

**Domain 4 Flow and Timing:** Describe any patients who did not receive the index test(s) and/or reference standard or who were excluded from the 2x2 table (refer to flow diagram): Describe the time interval and any interventions between index test(s) and reference standard:

| Questions                                                                                   | Answer (Yes, No or Unclear) | Motive        |
|---------------------------------------------------------------------------------------------|-----------------------------|---------------|
| 4.1 Was there an appropriate interval between index test(s) and reference standard?         | Unclear                     | Not mentioned |
| 4.2 Did all patients receive a reference standard??                                         | Yes                         |               |
| 4.3 Did all patients receive the same reference standard??                                  | Yes                         |               |
| 4.4 Were all patients included in the analysis?                                             | Yes                         |               |
| <b>RISK OF BIAS:</b><br>Could the patient flow have introduced bias? (High, Low or Unclear) | LOW                         |               |

**Paper 6: Uvodich et al. 2021**

**Domain 1 Patient selection:** Describe included patients (prior testing, presentation, intended use of index test and setting)

| Questions                                                                                                                       | Answer (Yes, No or Unclear) | Motive        |
|---------------------------------------------------------------------------------------------------------------------------------|-----------------------------|---------------|
| 1.1 Was a consecutive or random sample of patients enrolled?                                                                    | No                          | Retrospective |
| 1.2 Was a case-control design avoided?                                                                                          | Unclear                     |               |
| 1.3 Did the study avoid inappropriate exclusions?                                                                               | Yes                         |               |
| <b>RISK OF BIAS:</b><br>Could the selection of patients have introduced bias? (High, Low or Unclear)                            | HIGH                        |               |
| <b>APPLICABILITY:</b><br>Are there concerns that the included patients do not match the review question? (High, Low or Unclear) | LOW                         |               |

**Domain 2 Index test:** Describe the index test and how it was conducted and interpreted

| Questions                                                                                                                                                | Answer (Yes, No or Unclear) | Motive        |
|----------------------------------------------------------------------------------------------------------------------------------------------------------|-----------------------------|---------------|
| 2.1 Were the index test results interpreted without knowledge of the results of the reference standard?                                                  | Yes                         |               |
| 2.2 If a threshold was used, was it pre-specified??                                                                                                      | Unclear                     | Not specified |
| <b>RISK OF BIAS:</b><br>Could the conduct or interpretation of the index test have introduced bias? ? (High, Low or Unclear)                             | LOW                         |               |
| <b>APPLICABILITY:</b><br>Are there concerns that the index test, its conduct, or interpretation differ from the review question?? (High, Low or Unclear) | LOW                         |               |

**Domain 3 Reference Standard:** Describe the reference standard and how it was conducted and interpreted:

| Questions                                                                                               | Answer (Yes, No or Unclear) | Motive                                   |
|---------------------------------------------------------------------------------------------------------|-----------------------------|------------------------------------------|
| 3.1 Is the reference standard likely to correctly classify the target condition?                        | No                          | Major criteria, Cultures may be negative |
| 3.2 Were the reference standard results interpreted without knowledge of the results of the index test? | Yes                         |                                          |
| <b>RISK OF BIAS:</b><br>Could the reference standard, its conduct, or its interpretation                | HIGH                        |                                          |

|                                                                                                                                                                       |     |  |
|-----------------------------------------------------------------------------------------------------------------------------------------------------------------------|-----|--|
| have introduced bias? (High, Low or Unclear)                                                                                                                          |     |  |
| <b>APPLICABILITY:</b><br>Are there concerns that the target condition as defined by the reference standard does not match the review question? (High, Low or Unclear) | LOW |  |

**Domain 4 Flow and Timing:** Describe any patients who did not receive the index test(s) and/or reference standard or who were excluded from the 2x2 table (refer to flow diagram): Describe the time interval and any interventions between index test(s) and reference standard:

| Questions                                                                                   | Answer (Yes, No or Unclear) | Motive        |
|---------------------------------------------------------------------------------------------|-----------------------------|---------------|
| 4.1 Was there an appropriate interval between index test(s) and reference standard?         | Unclear                     | Not mentioned |
| 4.2 Did all patients receive a reference standard??                                         | Yes                         |               |
| 4.3 Did all patients receive the same reference standard??                                  | Yes                         |               |
| 4.4 Were all patients included in the analysis?                                             | Yes                         |               |
| <b>RISK OF BIAS:</b><br>Could the patient flow have introduced bias? (High, Low or Unclear) | LOW                         |               |



**Paper 7: Dugdale et al.2021**

**Domain 1 Patient selection:** Describe included patients (prior testing, presentation, intended use of index test and setting)

| Questions                                                                                                                       | Answer (Yes, No or Unclear) | Motive        |
|---------------------------------------------------------------------------------------------------------------------------------|-----------------------------|---------------|
| 1.1 Was a consecutive or random sample of patients enrolled?                                                                    | No                          | Retrospective |
| 1.2 Was a case-control design avoided?                                                                                          | Unclear                     |               |
| 1.3 Did the study avoid inappropriate exclusions?                                                                               | Yes                         |               |
| <b>RISK OF BIAS:</b><br>Could the selection of patients have introduced bias? (High, Low or Unclear)                            | HIGH                        |               |
| <b>APPLICABILITY:</b><br>Are there concerns that the included patients do not match the review question? (High, Low or Unclear) | LOW                         |               |

**Domain 2 Index test:** Describe the index test and how it was conducted and interpreted

| Questions                                                                                                                                                | Answer (Yes, No or Unclear) | Motive        |
|----------------------------------------------------------------------------------------------------------------------------------------------------------|-----------------------------|---------------|
| 2.1 Were the index test results interpreted without knowledge of the results of the reference standard?                                                  | Yes                         |               |
| 2.2 If a threshold was used, was it pre-specified??                                                                                                      | Unclear                     | Not specified |
| <b>RISK OF BIAS:</b><br>Could the conduct or interpretation of the index test have introduced bias? ? (High, Low or Unclear)                             | LOW                         |               |
| <b>APPLICABILITY:</b><br>Are there concerns that the index test, its conduct, or interpretation differ from the review question?? (High, Low or Unclear) | LOW                         |               |

**Domain 3 Reference Standard:** Describe the reference standard and how it was conducted and interpreted:

| Questions                                                                                               | Answer (Yes, No or Unclear) | Motive                                   |
|---------------------------------------------------------------------------------------------------------|-----------------------------|------------------------------------------|
| 3.1 Is the reference standard likely to correctly classify the target condition?                        | No                          | Major criteria, Cultures may be negative |
| 3.2 Were the reference standard results interpreted without knowledge of the results of the index test? | Yes                         |                                          |
| <b>RISK OF BIAS:</b><br>Could the reference standard, its conduct, or its interpretation                | HIGH                        |                                          |

|                                                                                                                                                                       |     |  |
|-----------------------------------------------------------------------------------------------------------------------------------------------------------------------|-----|--|
| have introduced bias? (High, Low or Unclear)                                                                                                                          |     |  |
| <b>APPLICABILITY:</b><br>Are there concerns that the target condition as defined by the reference standard does not match the review question? (High, Low or Unclear) | LOW |  |

**Domain 4 Flow and Timing:** Describe any patients who did not receive the index test(s) and/or reference standard or who were excluded from the 2x2 table (refer to flow diagram): Describe the time interval and any interventions between index test(s) and reference standard:

| Questions                                                                                   | Answer (Yes, No or Unclear) | Motive        |
|---------------------------------------------------------------------------------------------|-----------------------------|---------------|
| 4.1 Was there an appropriate interval between index test(s) and reference standard?         | Unclear                     | Not mentioned |
| 4.2 Did all patients receive a reference standard??                                         | Yes                         |               |
| 4.3 Did all patients receive the same reference standard??                                  | Yes                         |               |
| 4.4 Were all patients included in the analysis?                                             | Yes                         |               |
| <b>RISK OF BIAS:</b><br>Could the patient flow have introduced bias? (High, Low or Unclear) | LOW                         |               |
